# Supplementary material for: HECIL: A Hybrid Error Correction Algorithm for Long Reads with Iterative Learning
Source: PubMed Central journal article supplement (PMC6028576; doi:10.1038/s41598-018-28364-3), 2018-07-02
Supplement: 41598_2018_28364_MOESM1_ESM.pdf [file 41598_2018_28364_MOESM1_ESM.pdf]

# HECIL: A Hybrid Error Correction Algorithm for Long Reads with Iterative Learning

## *Supplementary Material*

Olivia Choudhury\*, Ankush Chakrabarty, Scott J. Emrich

Supplementary Figure S1:

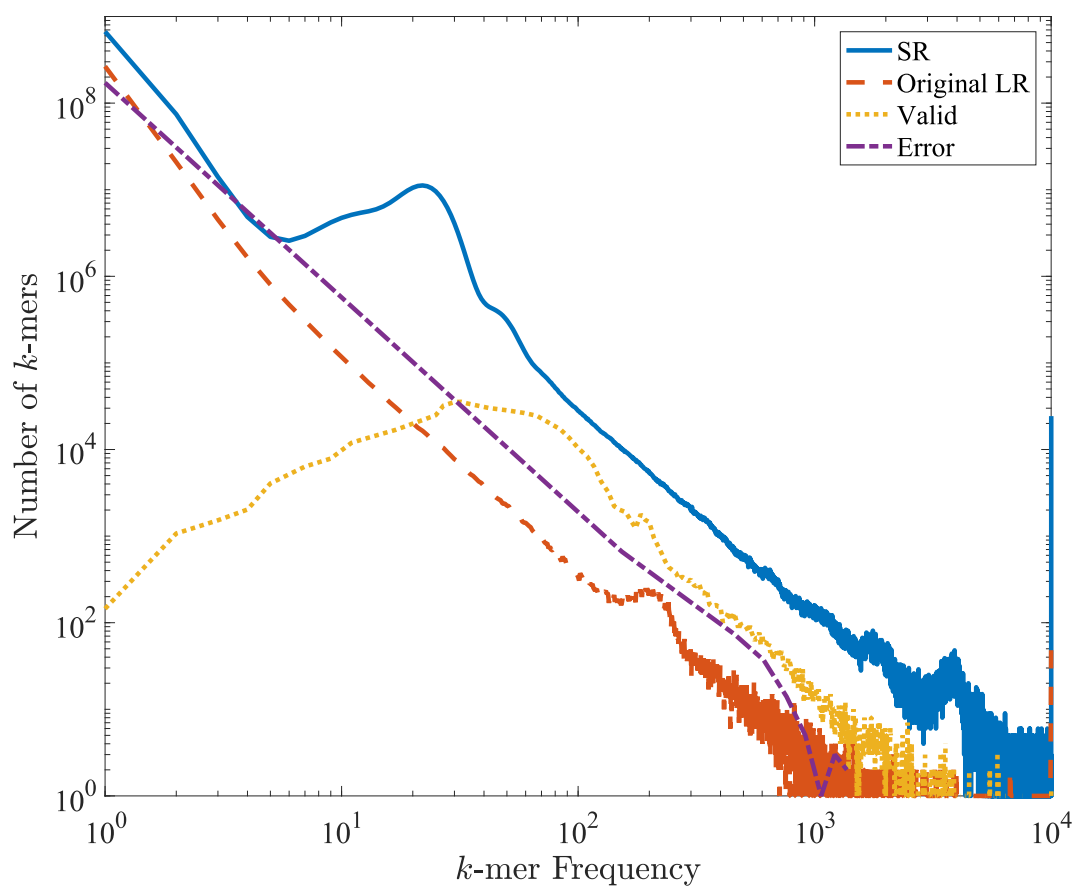

Figure S1: Distribution of  $k$ -mer frequency ( $k=17$ ) in *Anopheles funestus* flowcell #16. The  $x$  and  $y$ -axes denote  $k$ -mer frequency and count of frequency, respectively. The blue line and dashed red line represent  $k$ -mers generated from short reads (SR) and original long reads (Original LR), respectively. The dotted yellow line indicates that majority of the valid  $k$ -mers have high frequency. The purple dot-dashes, representing error  $k$ -mers (not found in short reads), mostly consists of unique  $k$ -mers.

\*Corresponding author: Olivia Choudhury: (ochoudhu@nd.edu)

## Supplementary Table S1:

| Data           | Evaluation Metric       | Original   | Canu – Assemble | HECIL – Improve   |
|----------------|-------------------------|------------|-----------------|-------------------|
| <i>E. coli</i> | # unique <i>k</i> -mers | 81,523,648 | 80,502,399      | <b>78,849,104</b> |
|                | # valid <i>k</i> -mers  | 14,531,881 | 8,407,389       | <b>9,256,011</b>  |
|                | # aligned reads         | 31,071     | 29,862          | <b>31,974</b>     |
|                | # aligned bases         | 86,642,500 | 84,395,516      | <b>86,014,915</b> |
|                | % matched bases         | 76.9       | 82.6            | <b>84.8</b>       |
|                | PI                      | 94.8       | 92.9            | <b>95.7</b>       |

Table S1: Comparison of *k*-mer-based and alignment-based metrics evaluated after correcting long reads of *E. coli* with Canu and further improving with HECIL.

## Supplementary Table S2:

| Data           | Evaluation Metric                    | Original  | Canu – Assemble | HECIL – Improve  |
|----------------|--------------------------------------|-----------|-----------------|------------------|
| <i>E. coli</i> | # Contigs                            | 182       | 38              | <b>27</b>        |
|                | Largest contig                       | 69,266    | 343,516         | <b>559,641</b>   |
|                | Total length                         | 3,508,197 | 4,585,942       | <b>4,702,681</b> |
|                | N50                                  | 24,663    | 176,245         | <b>213,973</b>   |
|                | NG50                                 | 17,847    | 343,516         | <b>356,014</b>   |
|                | Aligned base (%) - Ref / Query       | 83 / 84   | 89 / 92         | <b>93 / 94</b>   |
|                | Average Identity (1-1) - Ref / Query | 88 / 88   | 91 / 93         | <b>94 / 95</b>   |

Table S2: Comparison of assembly-based metrics evaluated after correcting long reads of *E. coli* with Canu and further improving with HECIL.
